# Supplementary material for: Diffusion- and Chemometric-Based Separation of Complex Electrochemical Signals That Originated from Multiple Redox-Active Molecules
Source: MDPI journal article supplement (doi:10.3390/polym14040717), 2022-02-13
Supplement: s1 [file s1]

## Supporting Information

# Diffusion- and Chemometric-Based Separation of Complex Electrochemical Signals that Originated from Multiple Redox-Active Molecules

Stav Biton Hayun, Rajendra P. Shukla and Hadar Ben-Yoav \*

Nanobioelectronics Laboratory (NBEL), Department of Biomedical Engineering,  
Ilse Katz Institute of

Nanoscale Science and Technology, Zlotowski Center for Neuroscience, Ben-  
Gurion University of the Negev, Beer-Sheva 8410501, Israel;

[stavbi@post.bgu.ac.il](mailto:stavbi@post.bgu.ac.il) (S.B.H.); [rajendra@post.bgu.ac.il](mailto:rajendra@post.bgu.ac.il) (R.P.S.)

\* Correspondence: [benyoav@bgu.ac.il](mailto:benyoav@bgu.ac.il); Tel.: +972-08-6479717

**Table S1.** Effective diffusion coefficients calculated for ascorbic acid (AA), clozapine (CLZ), ferricyanide (Ferri), L-homocysteine (HCy), and uric acid (UA) for different chitosan film thicknesses.

|                                                                    | Redox-active molecule | Thickness of the chitosan film (nm)            |                                                |                                                |                                                |                                                 |                                                 |
|--------------------------------------------------------------------|-----------------------|------------------------------------------------|------------------------------------------------|------------------------------------------------|------------------------------------------------|-------------------------------------------------|-------------------------------------------------|
|                                                                    |                       | Bare                                           | 33.4                                           | 40.9                                           | 54.7                                           | 72                                              | 84.1                                            |
| Effective diffusion coefficient [cm <sup>2</sup> s <sup>-1</sup> ] | AA                    | 4.53×10 <sup>-9</sup> ± 3.43×10 <sup>-13</sup> | 4.87×10 <sup>-9</sup> ± 1.19×10 <sup>-12</sup> | 5.34×10 <sup>-9</sup> ± 4.12×10 <sup>-13</sup> | 4.05×10 <sup>-9</sup> ± 1.21×10 <sup>-12</sup> | 7.53×10 <sup>-9</sup> ± 3.13×10 <sup>-12</sup>  | 3.56×10 <sup>-9</sup> ± 1.59×10 <sup>-13</sup>  |
|                                                                    | CLZ                   | 7.45×10 <sup>-7</sup> ± 4.22×10 <sup>-10</sup> | 3.26×10 <sup>-7</sup> ± 9.99×10 <sup>-11</sup> | 4.61×10 <sup>-8</sup> ± 4.46×10 <sup>-12</sup> | 1.40×10 <sup>-7</sup> ± 4.96×10 <sup>-11</sup> | 1.03×10 <sup>-7</sup> ± 7.11×10 <sup>-11</sup>  | 1.05×10 <sup>-7</sup> ± 1.96×10 <sup>-11</sup>  |
|                                                                    | Ferri                 | 6.85×10 <sup>-8</sup> ± 6.49×10 <sup>-9</sup>  | 1.27×10 <sup>-7</sup> ± 4.43×10 <sup>-8</sup>  | 8.38×10 <sup>-8</sup> ± 1.17×10 <sup>-8</sup>  | 5.80×10 <sup>-8</sup> ± 2.36×10 <sup>-8</sup>  | 4.52×10 <sup>-8</sup> ± 1.68×10 <sup>-8</sup>   | 5.93×10 <sup>-8</sup> ± 1.65×10 <sup>-8</sup>   |
|                                                                    | HCy                   | 3.01×10 <sup>-9</sup> ± 8.04×10 <sup>-13</sup> | 1.64×10 <sup>-9</sup> ± 9.09×10 <sup>-13</sup> | 1.50×10 <sup>-9</sup> ± 4.21×10 <sup>-13</sup> | 1.02×10 <sup>-9</sup> ± 7.79×10 <sup>-13</sup> | 5.63×10 <sup>-10</sup> ± 4.07×10 <sup>-13</sup> | 7.87×10 <sup>-10</sup> ± 4.87×10 <sup>-13</sup> |
|                                                                    | UA                    | 2.08×10 <sup>-9</sup> ± 2.23×10 <sup>-13</sup> | 1.78×10 <sup>-9</sup> ± 3.78×10 <sup>-13</sup> | 3.32×10 <sup>-9</sup> ± 2.65×10 <sup>-13</sup> | 2.03×10 <sup>-9</sup> ± 4.55×10 <sup>-13</sup> | 3.30×10 <sup>-9</sup> ± 3.56×10 <sup>-13</sup>  | 2.28×10 <sup>-9</sup> ± 3.58×10 <sup>-13</sup>  |

**Table S2.** The composition of solutions used for the chemometric PLSR model training.

| Solution number | Redox-active molecule concentration ( $\mu\text{M}$ ) |     |     |      |
|-----------------|-------------------------------------------------------|-----|-----|------|
|                 | CLZ                                                   | UA  | HCy | AA   |
| 1               | 3.75                                                  | 260 | 500 | 500  |
| 2               | 1                                                     | 260 | 500 | 1000 |
| 3               | 3.75                                                  | 140 | 300 | 1000 |
| 4               | 3.75                                                  | 380 | 400 | 500  |
| 5               | 3.75                                                  | 140 | 150 | 500  |
| 6               | 2.5                                                   | 260 | 400 | 1000 |
| 7               | 1                                                     | 500 | 500 | 1000 |
| 8               | 1                                                     | 260 | 300 | 1000 |
| 9               | 1                                                     | 500 | 400 | 1000 |
| 10              | 5                                                     | 260 | 400 | 200  |
| 11              | 3.75                                                  | 140 | 300 | 200  |
| 12              | 5                                                     | 260 | 400 | 500  |
| 13              | 3.75                                                  | 140 | 400 | 200  |
| 14              | 1                                                     | 140 | 300 | 200  |
| 15              | 5                                                     | 380 | 500 | 500  |
| 16              | 1                                                     | 260 | 300 | 200  |
| 17              | 3.75                                                  | 260 | 150 | 1000 |
| 18              | 5                                                     | 260 | 300 | 0    |
| 19              | 3.75                                                  | 140 | 300 | 0    |
| 20              | 2.5                                                   | 140 | 400 | 500  |
| 21              | 1                                                     | 260 | 300 | 500  |
| 22              | 3.75                                                  | 380 | 300 | 1000 |

|    |      |     |     |      |
|----|------|-----|-----|------|
| 23 | 5    | 140 | 400 | 200  |
| 24 | 3.75 | 500 | 400 | 200  |
| 25 | 2.5  | 380 | 300 | 500  |
| 26 | 1    | 500 | 400 | 500  |
| 27 | 1    | 140 | 500 | 500  |
| 28 | 3.75 | 500 | 150 | 500  |
| 29 | 2.5  | 260 | 150 | 500  |
| 30 | 2.5  | 380 | 300 | 200  |
| 31 | 1    | 380 | 150 | 500  |
| 32 | 5    | 500 | 150 | 1000 |
| 33 | 3.75 | 380 | 400 | 1000 |
| 34 | 1    | 500 | 150 | 0    |
| 35 | 3.75 | 260 | 500 | 0    |
| 36 | 2.5  | 260 | 400 | 0    |
| 37 | 3.75 | 500 | 500 | 200  |
| 38 | 3.75 | 500 | 150 | 0    |
| 39 | 2.5  | 140 | 150 | 1000 |
| 40 | 1    | 140 | 500 | 0    |
| 41 | 3.75 | 380 | 500 | 0    |
| 42 | 2.5  | 380 | 500 | 1000 |
| 43 | 2.5  | 260 | 500 | 200  |
| 44 | 1    | 140 | 400 | 0    |
| 45 | 2.5  | 140 | 150 | 1000 |
| 46 | 2.5  | 380 | 500 | 0    |
| 47 | 2.5  | 260 | 150 | 200  |
| 48 | 1    | 380 | 150 | 200  |
| 49 | 5    | 500 | 500 | 200  |

|    |     |     |     |      |
|----|-----|-----|-----|------|
| 50 | 2.5 | 500 | 500 | 200  |
| 51 | 5   | 500 | 300 | 500  |
| 52 | 5   | 380 | 400 | 1000 |
| 53 | 2.5 | 500 | 300 | 500  |
| 54 | 1   | 380 | 400 | 0    |
| 55 | 5   | 140 | 150 | 0    |
| 56 | 5   | 140 | 500 | 1000 |
| 57 | 2.5 | 500 | 400 | 0    |
| 58 | 5   | 260 | 150 | 0    |
| 59 | 2.5 | 500 | 300 | 0    |
| 60 | 5   | 500 | 300 | 1000 |
| 61 | 5   | 380 | 150 | 200  |
| 62 | 1   | 380 | 150 | 200  |
| 63 | 5   | 140 | 500 | 500  |
| 64 | 5   | 380 | 300 | 0    |

**Table S3.** The composition of solutions used for testing the trained chemometric PLSR model.

| Solution number | Molecule concentration ( $\mu\text{M}$ ) |     |     |      |
|-----------------|------------------------------------------|-----|-----|------|
|                 | CLZ                                      | UA  | HCy | AA   |
| 1               | 3.75                                     | 260 | 500 | 500  |
| 2               | 5                                        | 500 | 150 | 1000 |
| 3               | 3.75                                     | 500 | 400 | 200  |
| 4               | 1                                        | 140 | 500 | 1000 |
| 5               | 2.5                                      | 380 | 300 | 500  |
| 6               | 5                                        | 380 | 300 | 0    |
| 7               | 1                                        | 260 | 300 | 0    |
| 8               | 1                                        | 380 | 150 | 200  |
| 9               | 2.5                                      | 260 | 500 | 200  |
| 10              | 2.5                                      | 140 | 400 | 500  |
| 11              | 5                                        | 380 | 400 | 1000 |
| 12              | 5                                        | 260 | 300 | 0    |
| 13              | 3.75                                     | 260 | 300 | 0    |
| 14              | 2.5                                      | 380 | 300 | 200  |
| 15              | 3.75                                     | 380 | 500 | 0    |
| 16              | 5                                        | 260 | 150 | 1000 |
| 17              | 3.75                                     | 380 | 400 | 500  |
| 18              | 2.5                                      | 380 | 500 | 0    |
| 19              | 1                                        | 380 | 400 | 0    |
| 20              | 3.75                                     | 380 | 150 | 1000 |
| 21              | 5                                        | 380 | 150 | 0    |
| 22              | 5                                        | 260 | 150 | 500  |

|    |      |     |     |      |
|----|------|-----|-----|------|
| 23 | 3.75 | 140 | 150 | 200  |
| 24 | 5    | 260 | 400 | 500  |
| 25 | 5    | 500 | 150 | 1000 |
| 26 | 4.25 | 200 | 350 | 400  |
| 27 | 4.6  | 430 | 215 | 0    |
| 28 | 1.5  | 300 | 460 | 700  |
| 29 | 3.5  | 325 | 270 | 0    |
| 30 | 2    | 400 | 420 | 900  |
| 31 | 4.8  | 175 | 245 | 0    |

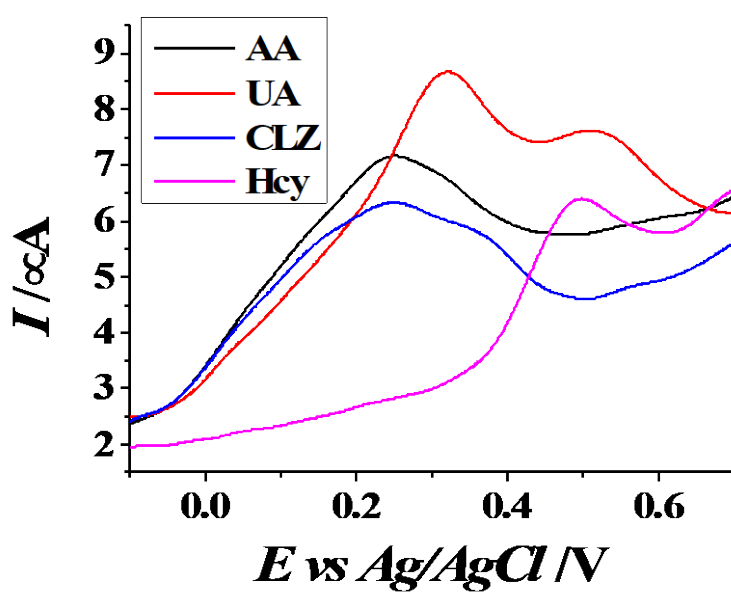

**Figure S1.** The electrochemical signatures measured from the same concentration of ascorbic acid (AA; black), uric acid (UA; red), clozapine (CLZ; blue), and L-homocysteine (Hcy; magenta) by using a gold bare electrode.

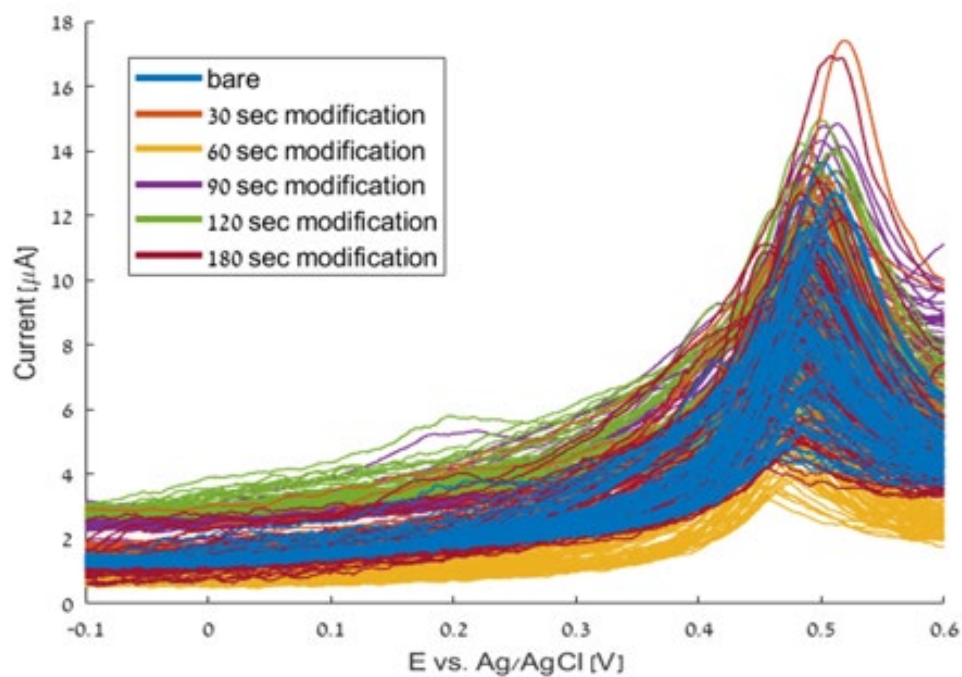

**Figure S2.** Example of the differential pulse voltammograms recorded from the different mixture solutions by using a bare electrode (blue) and electrodes modified with 30s- (orange), 60s- (yellow), 90s- (purple), 120s- (green), and 180s- (brown) chitosan electrodeposited electrodes.



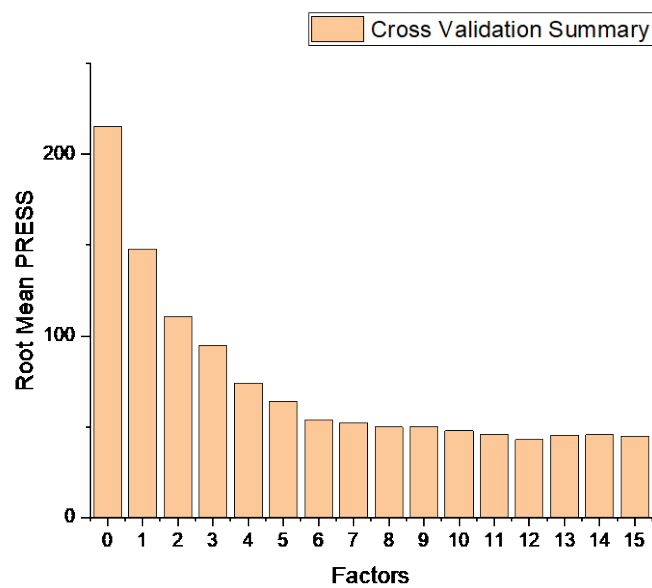

**Figure S3.** Root mean predicted residual error sum of squares (PRESS) calculated by a leave-one-out cross-validation.

**Table S4.** Explained X and Y variance.

| Number of Factors | Variance Explained for X Effects (%) | Cumulative X Variance (%) | Variance Explained for Y Responses (%) | Cumulative Y Variance (%) |
|-------------------|--------------------------------------|---------------------------|----------------------------------------|---------------------------|
| 1                 | 68.62809                             | 68.62809                  | 54.22085                               | 54.22085                  |
| 2                 | 11.45509                             | 80.08318                  | 22.44814                               | 76.66899                  |
| 3                 | 5.21964                              | 85.30282                  | 7.27516                                | 83.94415                  |
| 4                 | 2.16823                              | 87.47105                  | 8.41452                                | 92.35867                  |
| 5                 | 3.20797                              | 90.67901                  | 2.40783                                | 94.7665                   |
| 6                 | 1.46711                              | 92.14612                  | 1.72614                                | 96.49265                  |
| 7                 | 0.80359                              | 92.94972                  | 0.79287                                | 97.28552                  |
| 8                 | 0.90078                              | 93.85049                  | 0.48951                                | 97.77503                  |
| 9                 | 1.49947                              | 95.34997                  | 0.21606                                | 97.99109                  |
| 10                | 0.55315                              | 95.90311                  | 0.44503                                | 98.43613                  |
| 11                | 0.89668                              | 96.79979                  | 0.16075                                | 98.59688                  |
| 12                | 0.29571                              | 97.0955                   | 0.21004                                | 98.80691                  |
